# Supplementary material for: Validation of behavioral simulations: a case study on enhancing collaboration between partnership organizations
Source: Springer Nature journal article supplement (doi:10.1007/s10389-018-0948-y), 2018-06-30

# Supplementary Materials 1

# The Lateral Play simulation: Organisation datasets

# Greendale Partnership
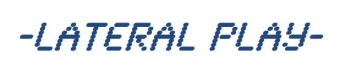


Appleton

Appleton is the largest Trust in the partnership and is linked to the medical school, it is working towards being an FT and is an AHSC. Appleton is within the North Greendale CCG area, it employs almost 5,000 staff and has over 400,000 patient episodes p.a. The buildings and facilities at Appleton are relatively new.

| **Trust Name** | **Appleton** |
| --- | --- |
|  |  |
| **Total activity ( p.a )** | 402,082 |
| **o/p activity p.a.** | 314,277 |
| **day case activity p.a.** | 20,605 |
| **total i/p activity p.a. ( incl. d/c)** | 87,805 |
| **Bed capacity** | 750 |
| **Bed occupancy %** | 84% |
| **Staff** | 4,729 |
| **Spend ( million p.a.)** | £328 |
| **Financial Position** | - £ 5.4 m |
| **financial comment** |  |
| **Spend / activity** | 814.6 |
| **Activity / staff** | 85.0 |
| **i/p : o/p activity** | 30% |
| **i/p activity / beds** | 117.1 |
| **day case : total i/p** | 23% |
| **Specialist services** | Emergency department |
|  | Regional Trauma Centre |
|  | Orthopaedics |
|  | Maternity Services |
|  | +++ large range of specialist services |
| **% share of under grads** | 40% |
| **No. of post grads** | 400 |
| **Research** | Approx. £ 100 million p.a. funding - NIHR BRC funding & MRC base |

**Orthopaedics:**

| **Criteria** | **Orthopaedics data** | **Ref. source** | **Value** |
| --- | --- | --- | --- |
| Quality | TKR / THR recovery within 24 hrs. | Dr Foster – est. % of patients walking within 24 hrs of surgery | 95% |
|  | PROMS – knee – to Mar ‘12 | HES – Oxford score – casemix adjusted – avg health gain | 17.7 |
|  | PROMS – hip – to Mar ‘12 | HES – Oxford score – casemix adjusted – avg health gain | 20.6 |
|  | MRSA rates (18th April 2012 ) | HPA – provider tables – ref 1a | 1.91% |
|  | Patient experience | Dr Foster % of patients who would recommend to a friend | 76% |
| Travel | Access by public transport | ? | Excellent |
|  | Access by blue light (8 mins.) | ? | 90% |
| Finance | Est. T&O income | HES x PbR HRG HA, B&C | £12.1 million |
|  | Total o/p (2012-13) | HES | 314,277 |
|  | T&O o/p (2012-13) | HES | 20,390 |
|  | Total i/p (2012-2013) | HES | 87,805 |
|  | T&O i/p (2012-13) | HES | 3,374 |
|  | Mean Length of Stay (LOS) | HES | 4.3 |
|  | Net surplus / deficit (T&O) |  |  |
| Training | T&O trainee numbers | Deanery | 12 |
|  |  | Quality of training index |  |
| Research |  | % 4 * (RAE) | 20 |
|  |  |  |  |
| Transition |  |  |  |

| Area |  | Appleton |
| --- | --- | --- |
| Quality | Clinical - recovery | ++ |
|  | Clinical – PROMS | + |
|  | Clinical MRSA rates | -- |
|  | Patient experience | + |
| Travel | Access to public transport | ++ |
|  | Avg. response time for blue light | ++ |
| Finance | Est. T&O income | £12m |
|  | Net surplus / (deficit) within T&O | -- |
| Training | T&O trainee numbers | ++ |
| Research | Value of research activity | ++ |
|  | Rating of academic research | ++ |
| Transition | To be confirmed … |  |
|  |  |  |

**Maternity:**

| **Area** |  |  |
| --- | --- | --- |
|  |  |  |
| births p.a |  | 3,304 |
| births - hospital led |  | 1,118 |
| births - midwife led |  | 1,585 |
| births - other / unknown led |  | 600 |
| births - cons ward |  | 1,652 |
| births - GP ward |  | - |
| births - cons / midwife / GP ward |  | - |
| births - other |  | 1,651 |
|  |  |  |

**Quality data:**

| **Area** |  | **Appleton** |
| --- | --- | --- |
| Quality | Patient survey – care received during labour | 8.4 |
|  | Maternity complaints / 10,000 episodes | 46.3 |
|  | Cleanliness ( very clean – no. of ratings received ) | 21 |
|  | Dignity & respect ( all of the time – no. of ratings received) | 24 |
| Travel | Ease of access | ++ |
| Finance | Est. maternity income | £11.5 m |
|  | Net surplus / (deficit) within Maternity | (£0.4 m) |
| Training | O&G trainee numbers | ++ |
| Research | Value of research activity | ++ |
|  | Rating of academic research | ++ |
| Transition |  |  |
|  |  |  |
| **For info** |  |  |
|  |  |  |

Pls note scale : ++ very good, + good, - limited, -- very limited / poor

Blackstone

Blackstone is an FT, it is a large DGH and is a busy, modern Acute Trust working with both CCGs. Blackstone has almost 4,000 staff and 550 beds.

| **Trust Name** | **Blackstone** |
| --- | --- |
|  |  |
| **Total activity ( p.a )** | 421,649 |
| **o/p activity p.a.** | 332,199 |
| **day case activity p.a.** | 27,953 |
| **total i/p activity p.a. ( incl. d/c)** | 89,451 |
| **Bed capacity** | 550 |
| **Bed occupancy %** | 88% |
| **Staff** | 3,848 |
| **Spend ( million p.a.)** | £241 |
| **Financial Position** | £ 3.9 m |
| **financial comment** |  |
| **Spend / activity** | 508.4 |
| **Activity / staff** | 109.9 |
| **i/p : o/p activity** | 30% |
| **i/p activity / beds** | 149.1 |
| **day case : total i/p** | 31% |
| **Specialist services** | Emergency department |
|  | Orthopaedics |
|  | Maternity Services |
|  |  |
| **% share of under grads** | 10% |
| **No. of post grads** | 50 |
| **Research** | Small pockets of research at Dept. level – approx.. £15 mill p.a. |

**Orthopaedics:**

| **Criteria** | **Orthopaedics data** | **Ref. source** | **Value** |
| --- | --- | --- | --- |
| Quality | TKR / THR recovery within 24 hrs. | Dr Foster – est. % of patients walking within 24 hrs of surgery | 85% |
|  | PROMS – knee – to Mar ‘12 | HES – Oxford score – casemix adjusted – avg health gain | 14.3 |
|  | PROMS – hip – to Mar ‘12 | HES – Oxford score – casemix adjusted – avg health gain | 21.4 |
|  | MRSA rates (18th April 2012 ) | HPA – provider tables – ref 1a | 1.15% |
|  | Patient experience | Dr Foster % of patients who would recommend to a friend | 73% |
| Travel | Access by public transport |  | Excellent |
|  | Access by blue light (8 mins) |  | 85% |
| Finance | Est. T&O income | HES x PbR HRG HA, B&C | £25.4 million |
|  | Total o/p (2012-13) | HES | 332,199 |
|  | T&O o/p (2012-13) | HES | 43,721 |
|  | Total i/p (2012-2013) | HES | 89,451 |
|  | T&O i/p (2012-13) | HES | 6,995 |
|  | Mean Length of Stay (LOS) | HES | 4.0 |
|  | Net surplus / deficit (T&O) |  |  |
| Training | T&O trainee numbers | Deanery | 2 |
|  |  | Quality of training index |  |
| Research |  | % 4 * (RAE) | 10 |
|  |  |  |  |
| Transition |  |  |  |

| Area |  | Blackstone |
| --- | --- | --- |
| Quality | Clinical - recovery | - |
|  | Clinical – PROMS | - |
|  | Clinical MRSA rates | -- |
|  | Patient experience | - |
| Travel | Access to public transport | ++ |
|  | Avg. response time for blue light | + |
| Finance | Est. T&O income | £25m |
|  | Net surplus / (deficit) within T&O | + |
| Training | T&O trainee numbers | + |
| Research | Value of research activity | - |
|  | Rating of academic research | - |
| Transition | To be confirmed … |  |
|  |  |  |

**Maternity:**

| **Area** |  |  |
| --- | --- | --- |
| births p.a |  | 4,074 |
| births - hospital led |  | 1,560 |
| births - midwife led |  | 2,510 |
| births - other / unknown led |  | 5 |
| births - cons ward |  | 0 |
| births - GP ward |  | 0 |
| births - cons / midwife / GP ward |  | 4,071 |
| births - other |  | 1 |
|  |  |  |

**Quality data:**

| **Area** |  | **Blackstone** |
| --- | --- | --- |
| **Quality** | Patient survey – care received during labour | **8.7** |
|  | Maternity complaints / 10,000 episodes | **58.1** |
|  | Cleanliness ( very clean – no. of ratings received ) | **13** |
|  | Dignity & respect ( all of the time – no. of ratings received) | **29** |
| **Travel** | Ease of access | **++** |
| **Finance** | Est. maternity income | **£14.22 m** |
|  | Net surplus / (deficit) within Maternity | **(£0.1 m)** |
| **Training** | O&G trainee numbers | **+** |
| **Research** | Value of research activity | **-** |
|  | Rating of academic research | **-** |
| **Transition** |  |  |
|  |  |  |
| **For info** |  |  |

Pls note scale : ++ very good, + good, - limited, -- very limited / poor

Chrysalis

Chrysalis is an Acute Trust with some community based pathways – it is working towards being an FT – it has recently invested in new facilities and buildings and is sited close to a new business district within the area. Chrysalis employs just over 2,000 staff and handles over 250,000 patients episodes p.a.

| **Trust Name** | **Chrysalis** |
| --- | --- |
| **Summary** |  |
| **Total activity ( p.a )** | 251,897 |
| **o/p activity p.a.** | 190,553 |
| **day case activity p.a.** | 20,598 |
| **total i/p activity p.a. ( incl. d/c)** | 61,344 |
| **Bed capacity** | 300 |
| **Bed occupancy %** | 92% |
| **Staff** | 2,011 |
| **Spend ( million p.a.)** | £123 |
| **Financial Position** | - £ 5.3 m |
| **financial comment** | Small PFI commitment - £5.8 million in new facilities. Discussing merger with another trust outside the region |
| **Spend / activity** | 488 |
| **Activity / staff** | 125.3 |
| **i/p : o/p activity** | 30% |
| **i/p activity / beds** | 204.5 |
| **day case : total i/p** | 34% |
| **Specialist services** | Emergency department |
|  |  |
|  | Orthopaedics |
|  | Maternity Services |
| **% share of under grads** | 10% |
| **No. of post grads** | 50 |
| **Research** | Community service based research with private sector – linked to large patient roll of approx. 250,000. |

**Orthopaedics:**

| **Criteria** | **Orthopaedics data** | **Ref. source** | **Value** |
| --- | --- | --- | --- |
| Quality | TKR / THR recovery within 24 hrs. | Dr Foster – est. % of patients walking within 24 hrs of surgery | 75% |
|  | PROMS – knee – to Mar ‘12 | HES – Oxford score – casemix adjusted – avg health gain | 16.2 |
|  | PROMS – hip – to Mar ‘12 | HES – Oxford score – casemix adjusted – avg health gain | 20.0 |
|  | MRSA rates (18th April 2012 ) | HPA – provider tables – ref 1a | 0 |
|  | Patient experience | Dr Foster % of patients who would recommend to a friend | 74% |
| Travel | Access by public transport |  | frequent |
|  | Access by blue light (8 mins.) |  | 75% |
| Finance | Est. T&O income | HES x PbR HRG HA, B&C | £13.8 million |
|  | Total o/p (2012-13) | HES | 190,553 |
|  | T&O o/p (2012-13) | HES | 21,660 |
|  | Total i/p (2012-2013) | HES | 61,344 |
|  | T&O i/p (2012-13) | HES | 3,890 |
|  | Mean Length of Stay (LOS) | HES | 3.2 |
|  | Net surplus / deficit (T&O) |  |  |
| Training | T&O trainee numbers | Deanery | 3 |
|  |  | Quality of training index |  |
| Research |  | % 4 * (RAE) | 5 |
|  |  |  |  |
| Transition |  |  |  |

| Area |  | Chrysalis |
| --- | --- | --- |
| Quality | Clinical - recovery | -- |
|  | Clinical – PROMS | + |
|  | Clinical MRSA rates | ++ |
|  | Patient experience | - |
| Travel | Access to public transport | + |
|  | Avg. response time for blue light | - |
| Finance | Est. T&O income | £14m |
|  | Net surplus / (deficit) within T&O | -- |
| Training | T&O trainee numbers | + |
| Research | Value of research activity | + |
|  | Rating of academic research | -- |
| Transition | To be confirmed … |  |
|  |  |  |

**Maternity:**

| **HES information** |  |
| --- | --- |
| births p.a | 3,416 |
| births - hospital led | 1,057 |
| births - midwife led | 2,061 |
| births - other / unknown led | 298 |
| births - cons ward | 395 |
| births - GP ward | 0 |
| births - cons / midwife / GP ward | 2,129 |
| births - other | 604 |
|  |  |

**Quality data:**

| **Area** |  | **Chrysalis** |
| --- | --- | --- |
| **Quality** | Patient survey – care received during labour | 8.7 |
|  | Maternity complaints / 10,000 episodes | 28.9 |
|  | Cleanliness ( very clean – no. of ratings received ) | 8.9 |
|  | Dignity & respect ( all of the time – no. of ratings received) | 8.89 |
| **Travel** | Ease of access | + |
| **Finance** | Est. maternity income | £11.92 m |
|  | Net surplus / (deficit) within Maternity | £0.1 m |
| **Training** | O&G trainee numbers | + |
| **Research** | Value of research activity | - |
|  | Rating of academic research | - |
| **Transition** |  |  |
|  |  |  |
| **For info** |  |  |

Pls note scale : ++ very good, + good, - limited, -- very limited / poor

Davenport

Davenport is an Acute Trust and is working towards being an FT. It is a similar size of hospital to Chrysalis and Essen. Davenport is sited in the middle of the North Greendale CCG area – but outside of the main urban centre. Davenport has almost 300,000 patient episodes p.a., has 400 patient beds and just over 2,200 staff.

Maternity services within Davenport are highly recommended by patients and there is spare capacity within their department. The lead Maternity consultant has been asked by the CCG to advise on options for the redesign of Maternity services including the option for midwife led birthing centres (e.g., maternity hotel).

| **Trust Name** | **Davenport** |
| --- | --- |
|  |  |
| **Total activity ( p.a )** | 299,185 |
| **o/p activity p.a.** | 236,291 |
| **day case activity p.a.** | 25,923 |
| **total i/p activity p.a. ( incl. d/c)** | 62,893 |
| **Bed capacity** | 400 |
| **Bed occupancy %** | 78% |
| **Staff** | 2,249 |
| **Spend ( million p.a.)** | £132 |
| **Financial Position** | - £ 5.8 m |
| **financial comment** |  |
| **Spend / activity** | 442.6 |
| **Activity / staff** | 133.0 |
| **i/p : o/p activity** | 30% |
| **i/p activity / beds** | 157.2 |
| **day case : total i/p** | 41% |
| **Specialist services** | Emergency department |
|  | Orthopaedics |
|  | Maternity Services |
| **% share of under grads** | 15% |
| **No. of post grads** | 100 |
| **Research** | Approx. £35 million p.a. - host organisation for NIHR & HIEC |

**Orthopaedics:**

| **Criteria** | **Orthopaedics data** | **Ref. source** | **Value** |
| --- | --- | --- | --- |
| Quality | TKR / THR recovery within 24 hrs. | Dr Foster – est. % of patients walking within 24 hrs of surgery | 95% |
|  | PROMS – knee – to Mar ‘12 | HES – Oxford score – casemix adjusted – avg health gain | 15.1 |
|  | PROMS – hip – to Mar ‘12 | HES – Oxford score – casemix adjusted – avg health gain | 18.7 |
|  | MRSA rates (18th April 2012 ) | HPA – provider tables – ref 1a | 0.38% |
|  | Patient experience | Dr Foster % of patients who would recommend to a friend | 51% |
| Travel | Access by public transport |  | Fair |
|  | Access by blue light (8 mins) |  | 65% |
| Finance | Est. T&O income | HES x PbR HRG HA, B&C | £12.5 million |
|  | Total o/p (2012-13) | HES | 236,291 |
|  | T&O o/p (2012-13) | HES | 17,521 |
|  | Total i/p (2012-2013) | HES | 62,893 |
|  | T&O i/p (2012-13) | HES | 3,651 |
|  | Mean Length of Stay (LOS) | HES | 4.5 |
|  | Net surplus / deficit (T&O) |  |  |
| Training | T&O trainee numbers | Deanery | 4 |
|  |  | Quality of training index |  |
| Research |  | % 4 * (RAE) | 10 |
|  |  |  |  |
| Transition |  |  |  |

| Area |  | Davenport |
| --- | --- | --- |
| Quality | Clinical - recovery | ++ |
|  | Clinical – PROMS | - |
|  | Clinical MRSA rates | - |
|  | Patient experience | -- |
| Travel | Access to public transport | + |
|  | Avg. response time for blue light | - |
| Finance | Est. T&O income | £12m |
|  | Net surplus / (deficit) within T&O | - |
| Training | T&O trainee numbers | + |
| Research | Value of research activity | - |
|  | Rating of academic research | - |
| Transition | To be confirmed … |  |
|  |  |  |

**Maternity:**

| **HES information** |  |
| --- | --- |
| births p.a | 3,084 |
| births - hospital led | 130 |
| births - midwife led | 2,604 |
| births - other / unknown led | 349 |
| births - cons ward | 0 |
| births - GP ward | 0 |
| births - cons / midwife / GP ward | 2,982 |
| births - other | 101 |
|  |  |

**Quality data:**

| **Area** |  | **Davenport** |
| --- | --- | --- |
| **Quality** | Patient survey – care received during labour | 8.5 |
|  | Maternity complaints / 10,000 episodes | 70.8 |
|  | Cleanliness ( very clean – no. of ratings received ) | 8.85 |
|  | Dignity & respect ( all of the time – no. of ratings received) | 9.19 |
| **Travel** | Ease of access | + |
| **Finance** | Est. maternity income | £10.76 m |
|  | Net surplus / (deficit) within Maternity | £0.5 m |
| **Training** | O&G trainee numbers | + |
| **Research** | Value of research activity | - |
|  | Rating of academic research | - |
| **Transition** |  |  |
|  |  |  |
| **For info ..** |  |  |

Pls note scale : ++ very good, + good, - limited, -- very limited / poor

Essen

Essen is an Acute FT – it is a busy, high performing Trust and works closely with other organisations outside the partnership given its location on the southern boundary of the area. Essen has annual activity levels of approx. 250,000 patient episodes, employs almost 4,000 staff and has 400 patient beds.

| **Trust Name** | **Essen** |
| --- | --- |
| **Summary** |  |
| **Specialist services** | Emergency department |
| **Total activity ( p.a )** | 258,896 |
| **o/p activity p.a.** | 193,374 |
| **day case activity p.a.** | 18,090 |
| **total i/p activity p.a. ( incl. d/c)** | 65,523 |
| **Bed capacity** | 400 |
| **Bed occupancy %** | 93% |
| **Staff** | 3,709 |
| **Spend ( million p.a.)** | £243 |
| **Financial Position** | £ 8.3 m |
| **financial comment** |  |
| **Spend / activity** | 939.9 |
| **Activity / staff** | 69.8 |
| **i/p : o/p activity** | 30% |
| **i/p activity / beds** | 163.8 |
| **day case : total i/p** | 28% |
|  | Orthopaedics |
|  | Maternity Services |
|  | incl. high value specialties |
| **% share of under grads** | 25% |
| **No. of post grads** | 20 |
| **Research** | £20million NIHR funding p.a. |
|  |  |

**Orthopaedics:**

| **Criteria** | **Orthopaedics data** | **Ref. source** | **Value** |
| --- | --- | --- | --- |
| Quality | TKR / THR recovery within 24 hrs. | Dr Foster – est. % of patients walking within 24 hrs of surgery | 90% |
|  | PROMS – knee – to Mar ‘12 | HES – Oxford score – casemix adjusted – avg health gain | 12.6 |
|  | PROMS – hip – to Mar ‘12 | HES – Oxford score – casemix adjusted – avg health gain | 20.5 |
|  | MRSA rates (18th April 2012 ) | HPA – provider tables – ref 1a | 0 |
|  | Patient experience | Dr Foster % of patients who would recommend to a friend | 65% |
| Travel | Access by public transport |  | Local |
|  | Access by blue light (8 mins.) |  | 50% |
| Finance | Est. T&O income | HES x PbR HRG HA, B&C | £13.8 million |
|  | Total o/p (2012-13) | HES | 193,374 |
|  | T&O o/p (2012-13) | HES | 23,309 |
|  | Total i/p (2012-2013) | HES | 65,523 |
|  | T&O i/p (2012-13) | HES | 3,809 |
|  | Mean Length of Stay (LOS) | HES | 4.3 |
|  | Net surplus / deficit (T&O) |  |  |
| Training | T&O trainee numbers | Deanery | 4 |
|  |  | Quality of training index |  |
| Research |  | % 4 * (RAE) | 10 |
|  |  |  |  |
| Transition |  |  |  |

| Area |  | Essen |
| --- | --- | --- |
| Quality | Clinical - recovery | + |
|  | Clinical – PROMS | -- |
|  | Clinical MRSA rates | ++ |
|  | Patient experience | - |
| Travel | Access to public transport | - |
|  | Avg. response time for blue light | -- |
| Finance | Est. T&O income | £13m |
|  | Net surplus / (deficit) within T&O | ++ |
| Training | T&O trainee numbers | + |
| Research | Value of research activity | - |
|  | Rating of academic research | - |
| Transition | To be confirmed … |  |
|  |  |  |

**Maternity**

| **HES information** |  |
| --- | --- |
| births p.a | 2,150 |
| births - hospital led | 689 |
| births - midwife led | 1,368 |
| births - other / unknown led | 93 |
| births - cons ward | 1,635 |
| births - GP ward | 415 |
| births - cons / midwife / GP ward | 0 |
| births - other | 88 |
|  |  |

**Quality data :**

| **Area** |  | **Essen** |
| --- | --- | --- |
| Quality | Patient survey – care received during labour | 9.0 |
|  | Maternity complaints / 10,000 episodes | 46.3 |
|  | Cleanliness ( very clean – no. of ratings received ) | 49 |
|  | Dignity & respect ( all of the time – no. of ratings received) | 48 |
| Travel | Ease of access | - |
| Finance | Est. maternity income | £7.5 m |
|  | Net surplus / (deficit) within Maternity | (£0.75 m) |
| Training | O&G trainee numbers | + |
| Research | Value of research activity | - |
|  | Rating of academic research | - |
| Transition |  |  |
|  |  |  |
| **For info ..** |  |  |

Pls note scale : ++ very good, + good, - limited, -- very limited / poor

Frontier

Frontier is a large Community Trust covering the South Greendale area. It is not an FT and discussions on an applicable FT pathway have been constrained by a deficit budget and limited evidence of growth.

As a Community Trust, Frontier does not offer mental health services, but has a focus on low risk day case activity and outpatients, with inpatient episodes accounting for only 10% of activity.

| **Trust Name** | **Frontier** |
| --- | --- |
| **Summary** |  |
| **Total activity (p.a.)** | 39,366 |
| **o/p activity p.a.** | 35,019 |
| **day case activity p.a.** | 243 |
| **i/p activity p.a.** | 4,347 |
| **Bed capacity** | 94 |
| **Bed occupancy %** | 82% |
| **Staff** | 2,576 |
| **Spend (million p.a.)** | £104 |
| **net surplus / (deficit)** | (£3.1 m) |
| **financial comment** |  |
| **Spend / activity** | 2641.9 |
| **Activity / staff** | 15.3 |
| **i/p : o/p activity** | 10% |
| **i/p activity / beds** | 46.2 |
| **day case : total i/p** | 6% |
| **Specialist services** | Nil |
| **% share of under grads** |  |
| **No. of post grads** |  |
| **Research** | Community based research linked to Diabetes with private sector – approx.. £10 million p.a. |
|  |  |

**Orthopaedics :**

| **Criteria** | **Orthopaedics data** | **Ref. source** | **Value** |
| --- | --- | --- | --- |
| Quality | TKR / THR recovery within 24 hrs. | Dr Foster – est. % of patients walking within 24 hrs of surgery |  |
|  | PROMS – knee – to Mar ‘12 | HES – Oxford score – casemix adjusted – avg health gain |  |
|  | PROMS – hip – to Mar ‘12 | HES – Oxford score – casemix adjusted – avg health gain |  |
|  | MRSA rates (18th April 2012 ) | HPA – provider tables – ref 1a |  |
|  | Patient experience | Dr Foster % of patients who would recommend to a friend | 100% |
| Travel | Access by public transport |  | Limited |
|  | Access by blue light |  | n/a |
| Finance | Est. T&O income | HES x PbR HRG HA, B&C | £400k |
|  | Total o/p (2012-13) | HES | 35,019 |
|  | T&O o/p (2012-13) | HES | 2,452 |
|  | Total i/p (2012-2013) | HES | 4,347 |
|  | T&O i/p (2012-13) | HES | 0 |
|  | Mean Length of Stay (LOS) | HES | 5.4 |
|  | Net surplus / deficit (T&O) |  |  |
| Training | T&O trainee numbers | Deanery | 0 |
|  |  | Quality of training index |  |
| Research |  |  | 21.2 |
|  |  |  |  |
| Transition |  |  |  |

Gateway

Gateway is the only Mental Health Trust in the partnership – it has yet to reach FT status. Gateway has over 600 patient beds and almost 3,000 staff. It is a national pioneer in online CBT.

Gateway has a large offering of community services for mental health patients, but doesn’t at present, offer community based services outside the mental health pathways.

The CCGs across the Partnership have agreed to adopt new integrated tariff arrangements covering Community and Mental Health services. This will have an impact on Gateway finances and may threaten the current FT pathway.

| **Trust Name** | **Gateway** |
| --- | --- |
| **Summary** | . |
| **Total activity ( p.a )** | 418,645 |
| **o/p activity p.a.** | 415,700 |
| **i/p activity p.a.** | 2,945 |
| **Bed capacity** | 601 |
| **Bed occupancy %** | 91% |
| **Staff** | 3,153 |
| **Spend ( million p.a.)** | £154 |
| **net surplus / (deficit)** | £8.4 m |
| **financial comment** |  |
| **Spend / activity** | 367.9 |
| **Activity / staff** | 132.8 |
| **i/p activity / beds** | 4.9 |
| **Specialist services** | Mental Health |
| **% share of under grads** |  |
| **No. of post grads** |  |
| **Research** | £ 30 million p.a. - specialist mental health research interests |

**Orthopaedics :**

| **Orthopaedics data** | |
| --- | --- |
| HES Total o/p (2012-13) | 415,700 |
| HES T&O o/p (2012-13) | 0 |
| HES Total i/p (2012-2013) | 2,945 |
| HES T&O i/p (2012-13) | 0 |

C.O.R.E. Clinical & Organisational Research and Education

The C.O.R.E. group comprises the Medical School, the LETB and the CLAHRC within the Greendale area. The members of the group will be responsible for ensuring that due consideration is given to the research and education agenda during al discussions. The aim of the group should be to enhance the opportunities for education and research in each of the working group proposals.

The group should also ensure that developments and changes align with their (CORE) needs and expectations. The working groups will need CORE "sign off" for any proposed changes.

**
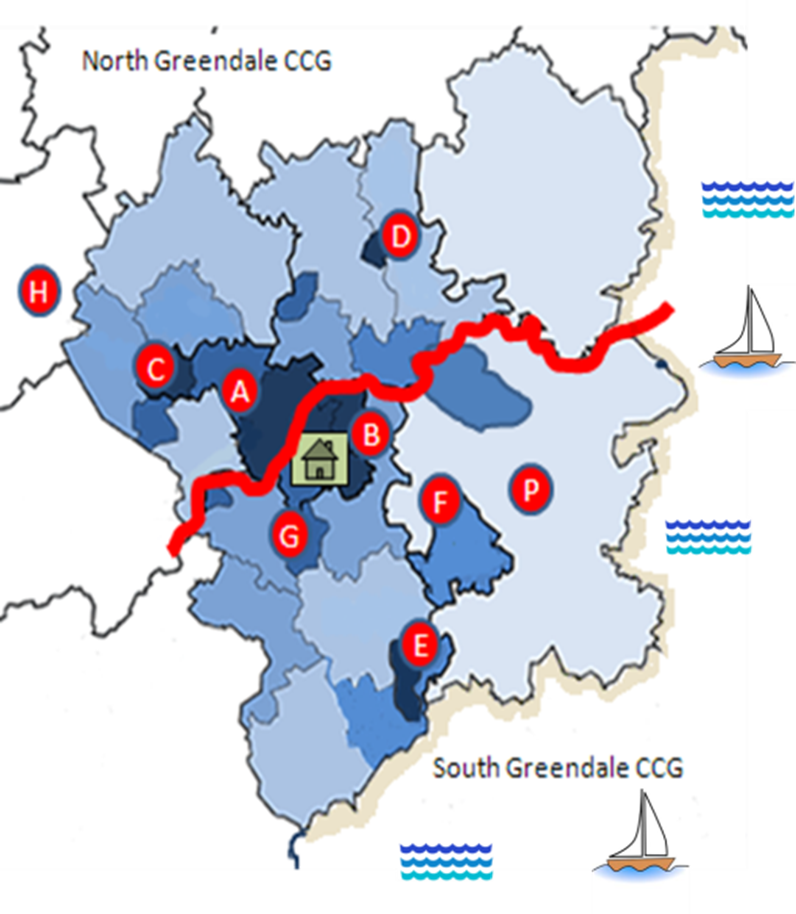
**

North Greendale CCG

North Greendale CCG covers a population of approx. 800,000 population and there are 3 Trusts Appleton, Chrysalis and Davenport within the area.

North Greendale CCG has been involved in discussions around the reconfiguration of Orthopaedic services and the redesign of Maternity services and is very supportive. The CCG has made a commitment to commission in line with the working group outcomes.

North Greendale CCG commissions community services from Howston – an FT outside the Partnership - the contract is coming up for re-tender. Howston has recently approached North Greendale CCG with an offer which in line with the new tariff arrangements, combines community and mental health provision.

The CCG should also ensure that developments and changes align with their commissioning needs and expectations. The working groups will need CCG "sign off" for any proposed changes.

Note : The integrated tariff to be adopted by the CCGs covers community and mental health pathways – the provider will agree a treatment pathway applicable to patient needs but will receive a single ‘standard’ payment (similar to the new maternity pathway payment) instead of individual 'fee-for-service' payments. In areas where a high number of patients have complex needs – this could have considerable impact on provider finances.

South Greendale CCG

South Greendale CCG covers a population of approx. 1.2 million and there are 4 Trusts Blackstone, Essen, Frontier and Gateway within the area. The University / Medical is also centred within the South Greendale area.

South Greendale CCG has been involved in discussions around the reconfiguration of Orthopaedic services and the redesign of Maternity services and is very supportive. The CCG has made a commitment to commission in line with the working group outcomes.

The CCG should also ensure that developments and changes align with their commissioning needs and expectations. The working groups will need CCG "sign off" for any proposed changes.

**
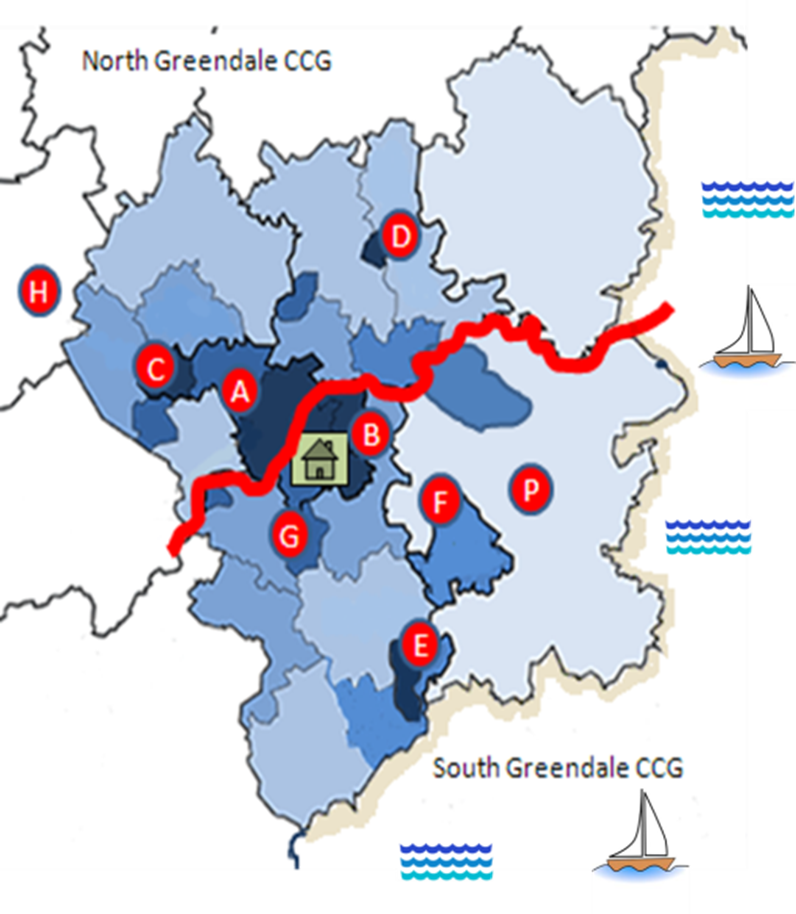
**

# Supplementary Materials 2

| Lateral Play participants: real-life and simulation roles (anonymised) |
| --- |
| | Simulation role | Real-life role in NW London NHS | | --- | --- | | Appleton CEO | CEO (Chief Executive Officer) | | Appleton DoS | DoS (Director of Strategy) | | Appleton Med Dir | MD (Medical Director) | |  |  | | Blackstone CEO | CEO | | Blackstone Chair | Chairman | | Blackstone Med Lead ( Mat) | Acute medical director | |  |  | | Chrysalis CEO | CEO | | Chrysalis CFO | CFO (Chief Financial Officer) | | Chrysalis Med Dir | MD | |  |  | | Davenport CEO | CEO | | Davenport Clinical lead | Clinical Director | | Davenport Med Dir | MD | |  |  | | Essen CEO | CEO | | Essen Med (T&O) | Lead T&O | | Essen Service director | Service Director | |  |  | | Frontier CEO | CEO | | Frontier Med Dir | MD | | Frontier Nursing Lead | Nursing Lead | |  |  | | Gateway CEO | CEO | | Gateway Dir Strategy | DoS | | Gateway Med Dir | MD | |  |  | | North CCG - Chair | CCG Chair | | North CCG - GP | GP | | South CCG - Chair | CCG Chair | | South CCG - GP | GP | |  |  | | CORE - Clinical & Org Research & Ed. | CLAHRC | | CLAHRC | CLAHRC | | Dean Med School | Dean of Medical School | | Chair of Partnership | Ara Darzi | | MD of Partnership | Adrian Bull | |

# Supplementary Materials 3

**Participant questionnaires pre and post-simulation**

# The Lateral Play simulation:
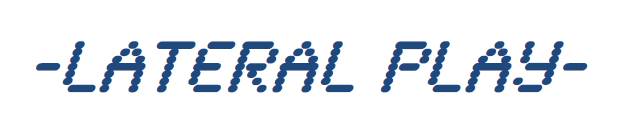


**Survey 1 - Imperial College Health Partners (ICHP)**

- Please note: this information is being collected by Imperial College London, on behalf of ICHP to better understand the development needs of ICHP.
- All information will treated confidentially
- ICHP will only have access to the data after it has been anonymised.

Imperial College Health Partners (ICHP) is a newly formed organisation spanning the healthcare interests of providers and commissioners in the area of North West London. The aim of the partnership is to bring about real, practical improvements to the quality of healthcare delivery and the research agenda across the whole population. The vision is for ICHP to act as the driving force for collaborative working across North West London to deliver improvements in patient care and population health, generate value for the taxpayer, support and develop staff and create wealth for the economy. Long-term relationships need to be built to ensure trust and understanding and to create space for innovative working and creative thinking. ICHP will be a source for knowledge capital, consisting of human capital (new knowledge, skills ideas and practices), social capital (new relationships, reputation and trust), and structural capital (new organising structures, routines, documents and tools).

The aim of this survey is to measure your perception of the development of ICHP and also asks you to consider your role within this Partnership. Please be open and honest in your views – the survey will be repeated in six month’s time and results will be compared. ICHP will be able to focus development plans based on the results from each survey and the progression over the six month period.

Thank you for your time in completing this survey!

Name: ­­­­­­­­­­­­­­­­­_____________________________________________________

**Section 1**

These questions test your perception of the Partnership based on its ability to meet stated objectives around research, adoption of innovation and wealth creation.

Please rate ICHP’s performance in the following areas:

**1-poor to 7-excellent**

|  |  |  |  |  |  |  |  |
| --- | --- | --- | --- | --- | --- | --- | --- |
| improving research participation | 1 | 2 | 3 | 4 | 5 | 6 | 7 |
| translating research into practice | 1 | 2 | 3 | 4 | 5 | 6 | 7 |
| achieving service improvement | 1 | 2 | 3 | 4 | 5 | 6 | 7 |
| collaborating on education and training | 1 | 2 | 3 | 4 | 5 | 6 | 7 |
| better use of information | 1 | 2 | 3 | 4 | 5 | 6 | 7 |
| fostering wealth creation | 1 | 2 | 3 | 4 | 5 | 6 | 7 |
| achieving population wide health benefit | 1 | 2 | 3 | 4 | 5 | 6 | 7 |

**Section 2**

According to recent theoretical frameworks in social sciences, human behaviour is influenced by an interaction of Capability, Opportunity, and Motivation. This framework will help understand some of the drivers and barriers to achieving the key objectives of ICHP

- Capability is defined as the individual’s psychological and physical capacity to engage in the activity concerned.
- Opportunity is defined as all the factors, social and physical, which are outside the individual and make the behaviour possible or prompt it.
- Motivation is defined as the psychological processes that energize and direct behaviour, which include beliefs, attitudes, emotions and habits.

The survey looks at your assessment of your own capability, motivation and opportunity to help contribute to the development of the Partnership in achieving its objectives.

**Section 3**

Capability is what people are able to do and to be. This includes the extent to which you are able to adapt to change, generate new knowledge, and improve your performance. Important aspects of capability in the context of the ICHP are assumed to be collaboration and leadership skills.

Please rate your personal CAPABILITY to contribute to the following objectives of the ICHP:

**1-poor to 7-excellent**

|  |  |  |  |  |  |  |  |
| --- | --- | --- | --- | --- | --- | --- | --- |
| improving research participation | 1 | 2 | 3 | 4 | 5 | 6 | 7 |
| translating research into practice | 1 | 2 | 3 | 4 | 5 | 6 | 7 |
| achieving service improvement | 1 | 2 | 3 | 4 | 5 | 6 | 7 |
| collaborating on education and training | 1 | 2 | 3 | 4 | 5 | 6 | 7 |
| better use of information | 1 | 2 | 3 | 4 | 5 | 6 | 7 |
| fostering wealth creation | 1 | 2 | 3 | 4 | 5 | 6 | 7 |
| achieving population wide health benefit | 1 | 2 | 3 | 4 | 5 | 6 | 7 |

**Section 4**

Opportunity refers to conditions (physical and social) that are external to the individual. Physical opportunity is afforded by the environment, such as organizational structures and resources. Social opportunity refers to the milieu that dictates the way that we think about things, the words and concepts we use and the predominant discourse, such as the organizational culture.

Please rate the extent to which you personally have OPPORTUNITY afforded to you in your role to contribute to the following objectives of the ICHP:

**1-poor to 7-excellent**

|  |  |  |  |  |  |  |  |
| --- | --- | --- | --- | --- | --- | --- | --- |
| improve research participation | 1 | 2 | 3 | 4 | 5 | 6 | 7 |
| translate research into practice | 1 | 2 | 3 | 4 | 5 | 6 | 7 |
| achieve service improvement | 1 | 2 | 3 | 4 | 5 | 6 | 7 |
| collaborate on education and training | 1 | 2 | 3 | 4 | 5 | 6 | 7 |
| better use of information | 1 | 2 | 3 | 4 | 5 | 6 | 7 |
| foster wealth creation | 1 | 2 | 3 | 4 | 5 | 6 | 7 |
| achieve population wide health benefit | 1 | 2 | 3 | 4 | 5 | 6 | 7 |

**Section 5**

Motivation can be divided into reflective and automatic processes. Reflective motivation involves more conscious decision making in which a choice or intention is present based on beliefs and attitudes about the consequences. Automatic motivation is based on emotions and impulses that arise from associative learning or innate dispositions. Resistance to change or work engagement are examples of automatic motivation.

Please rate your personal MOTIVATION to contribute to the following objectives of the ICHP:

**1-poor to 7-excellent**

|  |  |  |  |  |  |  |  |
| --- | --- | --- | --- | --- | --- | --- | --- |
| improve research participation | 1 | 2 | 3 | 4 | 5 | 6 | 7 |
| translate research into practice | 1 | 2 | 3 | 4 | 5 | 6 | 7 |
| achieve service improvement | 1 | 2 | 3 | 4 | 5 | 6 | 7 |
| collaborate on education and training | 1 | 2 | 3 | 4 | 5 | 6 | 7 |
| better use of information | 1 | 2 | 3 | 4 | 5 | 6 | 7 |
| foster wealth creation | 1 | 2 | 3 | 4 | 5 | 6 | 7 |
| achieve population wide health benefit | 1 | 2 | 3 | 4 | 5 | 6 | 7 |

**Survey 2 - Imperial College Health Partners (ICHP)**

- Please note: this information is being collected by Imperial College London, on behalf of ICHP to better understand the development needs of ICHP.
- All information will treated confidentially
- ICHP will only have access to the data after it has been anonymised.

The aim throughout the simulation is to foster and encourage active contribution to the wider partnership at all times, the participants will be briefed on the need to focus on innovation adoption, collaboration and governance.

The aim of this survey is to measure the impact of the simulation of the development of ICHP and each individual’s understanding of their role within the partnership. Please be open with your answers. There are no right / wrong answers.

Thank you for your time in completing this survey!

Name: ­­­­­­­­­­­­­­­­­_____________________________________________________

**Section 1:**

**Was this your first attendance at a behavioural simulation? Yes No**

|  | disagree |  |  |  | agree |
| --- | --- | --- | --- | --- | --- |
| The simulation was well organised | 1 | 2 | 3 | 4 | 5 |
| I understood the aims and objectives of the simulation | 1 | 2 | 3 | 4 | 5 |
| I was appropriately challenged by the material | 1 | 2 | 3 | 4 | 5 |
| I found the simulation content to be realistic | 1 | 2 | 3 | 4 | 5 |
| I found the simulation content to be relevant | 1 | 2 | 3 | 4 | 5 |
| I was actively involved in the simulation | 1 | 2 | 3 | 4 | 5 |
| I found this method of learning to be useful | 1 | 2 | 3 | 4 | 5 |
| I would like to take part in similar simulation events in future | 1 | 2 | 3 | 4 | 5 |

**Section 2:**

What do you think are the benefits of using this type of simulation?

e.g. team working, safe environment, multi-stage event, reflection etc **__________________________________________________________________________________________________________________________________________________________**

If you hadn’t attended the simulation, how else would you have learned about the issues covered?

**Section 3 : This section looks at the impact of the simulation on the partnership**

I understand the objectives of the ICHP

Strongly disagree 1 2 3 4 5 6 7 Strongly agree

I am aware of my current/future roles and responsibilities within the ICHP

Strongly disagree 1 2 3 4 5 6 7 Strongly agree

I am aware of the issues facing the ICHP

Strongly disagree 1 2 3 4 5 6 7 Strongly agree

I am able to address important issues facing the ICHP

Strongly disagree 1 2 3 4 5 6 7 Strongly agree

This section looks at your perception of the needs of the partnership

How important are the needs of the partnership in your work?

Not important at all 1 2 3 4 5 6 7 very important

How important are the needs of your trust/organisation in comparison to the needs of the partnership?”

Not important at all 1 2 3 4 5 6 7 very important

**Section 4**

Has the Lateral Play simulation made you more aware of your collaboration and cooperation needs within ICHP? If so, how?

**Survey 3 - Imperial College Health Partners (ICHP)**

This information is being collected by Imperial College London, on behalf of Imperial College Health Partners (ICHP). All information will be treated confidentially. ICHP will only have access to the data after it has been anonymised.

The vision of the Partnership is to act as the driving force for collaborative working across North West London to deliver improvements in patient care and population health, generate value for the taxpayer, support and develop staff and create wealth for the economy. Long-term relationships need to be built to ensure trust and understanding and to create space for innovative working and creative thinking.

The aim of this survey is to measure your perception of the development of ICHP since the Lateral Play simulation and also asks you to consider your role within the Partnership. Please be open and honest in your views. ICHP will be able to focus development plans based on the results from the survey.

Thank you for your time in completing this survey

**Section 1**

After the Lateral Play simulation in 2013, a partnership development plan was created and adopted by the ICHP board. With commitment to this development plan in mind, we would like you to respond to the following questions related to your perception of the partnership going forward.

A summary of the plan is below - the survey begins on the next page:


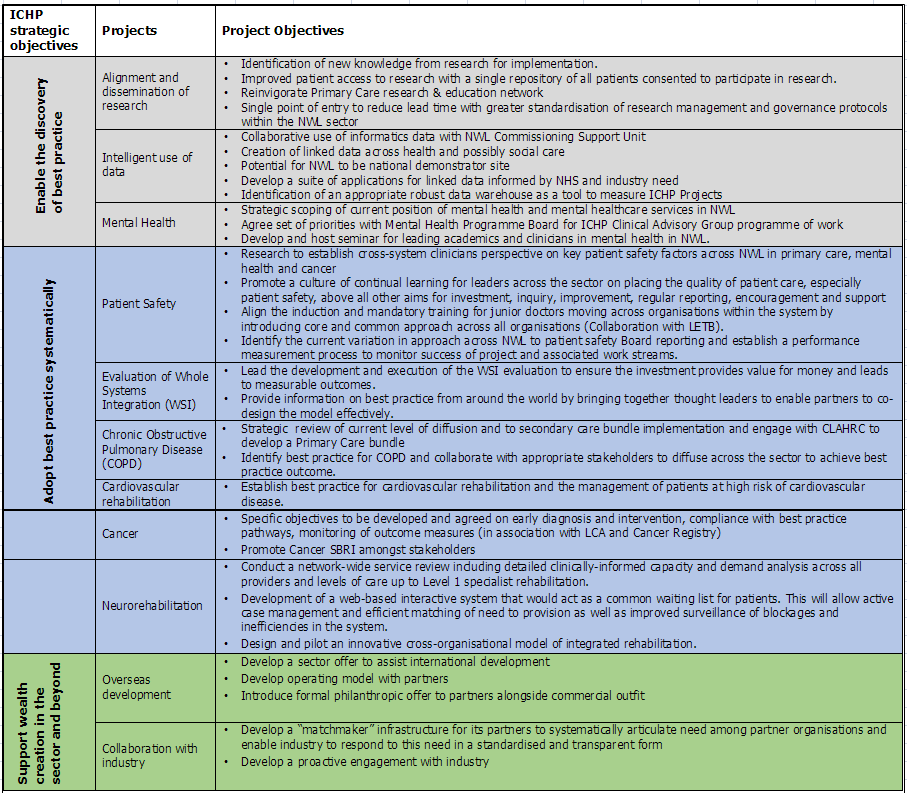


**New Screen**

With the implementation of the ICHP development plan in mind, encompassing the strategic and project objectives, how would you assess current performance of ICHP in comparison to what the group said a year ago?

NOTE: The most commonly given response given prior to the Lateral Play simulation is in brackets next to each question

|  |  |  |  |  |  |  |  |
| --- | --- | --- | --- | --- | --- | --- | --- |
| improve research participation (3) | 1 | 2 | 3 | 4 | 5 | 6 | 7 |
| translate research into practice (3) | 1 | 2 | 3 | 4 | 5 | 6 | 7 |
| achieve service improvement (3) | 1 | 2 | 3 | 4 | 5 | 6 | 7 |
| collaborate on education and training (4) | 1 | 2 | 3 | 4 | 5 | 6 | 7 |
| better use of information (4) | 1 | 2 | 3 | 4 | 5 | 6 | 7 |
| foster wealth creation (3) | 1 | 2 | 3 | 4 | 5 | 6 | 7 |
| achieve population wide health benefit (4) | 1 | 2 | 3 | 4 | 5 | 6 | 7 |

Do you have any comments on the above?­­­­­­­­­­­­­­­­­­_____________________________________________________________________________

**Section 2**

Human behaviour is influenced by a interaction of Capability, Opportunity, and Motivation. This framework will help understand some of the drivers and barriers to achieving the key objectives of ICHP

• Capability is defined as the individual’s psychological and physical capacity to engage in the activity concerned.

• Opportunity is defined as all the factors, social and physical, which are outside the individual and make the behaviour possible or prompt it.

• Motivation is defined as the psychological processes that energize and direct behaviour, which include beliefs, attitudes, emotions and habits.

The survey looks at your assessment of your own capability, motivation and opportunity to help contribute to the development of the Partnership in achieving its objectives.

Capability is what people are able to do and to be. This includes the extent to which you are able to adapt to change, generate new knowledge, and improve your performance. Important aspects of capability in the context of the ICHP are assumed to be collaboration and leadership skills.

Please rate your personal CAPABILITY to contribute to the following objectives of the ICHP:

**1-poor to 7-excellent**

|  |  |  |  |  |  |  |  |
| --- | --- | --- | --- | --- | --- | --- | --- |
| improving research participation | 1 | 2 | 3 | 4 | 5 | 6 | 7 |
| translating research into practice | 1 | 2 | 3 | 4 | 5 | 6 | 7 |
| achieving service improvement | 1 | 2 | 3 | 4 | 5 | 6 | 7 |
| collaborating on education and training | 1 | 2 | 3 | 4 | 5 | 6 | 7 |
| better use of information | 1 | 2 | 3 | 4 | 5 | 6 | 7 |
| fostering wealth creation | 1 | 2 | 3 | 4 | 5 | 6 | 7 |
| achieving population wide health benefit | 1 | 2 | 3 | 4 | 5 | 6 | 7 |

Opportunity refers to conditions (physical and social) that are external to the individual. Physical opportunity is afforded by the environment, such as organizational structures and resources. Social opportunity refers to the milieu that dictates the way that we think about things, the words and concepts we use and the predominant discourse, such as the organizational culture.

Please rate the extent to which you personally have OPPORTUNITY afforded to you in your role to contribute to the following objectives of the ICHP:

**1-poor to 7-excellent**

|  |  |  |  |  |  |  |  |
| --- | --- | --- | --- | --- | --- | --- | --- |
| improve research participation | 1 | 2 | 3 | 4 | 5 | 6 | 7 |
| translate research into practice | 1 | 2 | 3 | 4 | 5 | 6 | 7 |
| achieve service improvement | 1 | 2 | 3 | 4 | 5 | 6 | 7 |
| collaborate on education and training | 1 | 2 | 3 | 4 | 5 | 6 | 7 |
| better use of information | 1 | 2 | 3 | 4 | 5 | 6 | 7 |
| foster wealth creation | 1 | 2 | 3 | 4 | 5 | 6 | 7 |
| achieve population wide health benefit | 1 | 2 | 3 | 4 | 5 | 6 | 7 |

Motivation can be divided into reflective and automatic processes. Reflective motivation involves more conscious decision making in which a choice or intention is present based on beliefs and attitudes about the consequences. Automatic motivation is based on emotions and impulses that arise from associative learning or innate dispositions. Resistance to change or work engagement are examples of automatic motivation.

Please rate your personal MOTIVATION to contribute to the following objectives of the ICHP:

**1-poor to 7-excellent**

|  |  |  |  |  |  |  |  |
| --- | --- | --- | --- | --- | --- | --- | --- |
| improve research participation | 1 | 2 | 3 | 4 | 5 | 6 | 7 |
| translate research into practice | 1 | 2 | 3 | 4 | 5 | 6 | 7 |
| achieve service improvement | 1 | 2 | 3 | 4 | 5 | 6 | 7 |
| collaborate on education and training | 1 | 2 | 3 | 4 | 5 | 6 | 7 |
| better use of information | 1 | 2 | 3 | 4 | 5 | 6 | 7 |
| foster wealth creation | 1 | 2 | 3 | 4 | 5 | 6 | 7 |
| achieve population wide health benefit | 1 | 2 | 3 | 4 | 5 | 6 | 7 |

Finally, thinking back to the Lateral Play simulation, do you think that the simulation had a positive, negative or a neutral impact on the development and progression of the partnership? Are you able to give examples?

______________________________________________________________________________________________________________________________________________________________________________________________________

Thank you for taking the time to complete this questionnaire

# Supplementary Materials 4

# The Lateral Play simulation: Greendale news reports and press releases developed during the simulation

Issue 1 March 2013

---------------------------------------------------------------------------------------------------------------------

**GREENDALE COURIER**

------------------------------------------------------------------------------------------------------------------------

***US Health Giant “seeks to profit from Greendale patients”.***

*By our Sickie Correspondent.*

A giant US health company is planning to make big profits by closing wards in Greendale’s local hospitals and forcing frail elderly patients to be treated in their own homes instead.

Mountain Health, one of America’s biggest private health plans wants to launch a joint venture with the newly formed Greendale Partnership – the grouping of all the hospitals and health providers in the borough – to treat patients in a “virtual” ward rather than a real one.

If the programme works, Mountain Health and Greendale plan “ a roll out of the programme into other countries on the continent” according to a paper put to the board of the Greendale Partnership. The “commercial benefits could be significant for the Greendale Partnership”, the paper says.

Tom ‘I know where the votes lie’ Parsons, Labour’s health spokesman on Greendale Brough Council said “this is yet another example of this government’s drive to privatise the NHS come hell or high water. This time is not just a US health company but our own local hospitals who are putting profits before patients.”

A spokesman for Greendale North said no decision had yet been made on Mountain Health’s proposal but “we know that given a choice patients would much rather be cared for in their own homes than in a hospital. This approach of a ‘virtual’ ward has already been tried in other parts of England and patients like it. It means fewer hospital admissions, less risk to patients from going into hospital, and better treatment at home.” The spokesman conceded that fewer admissions might lead to fewer beds and wards being needed in hospital.

Mountain Health said it used the programme – which can involve using new technology to monitor patients with complex medical and social needs remotely - very successfully in the United States. “But we need proof of concept in Europe.

The spokesman denied the US health care giant was planning to “experiment” on Greendale’s patients. “We just need to demonstrate that what works in the US works as well here in a very different context.”

Mountain Health is a “not for profit” in the US terms. But last year it reported $900m dollars of profit from its insurance and health care provision business. It was also fined $300m by the US authorities for false claims under the United States Medicaid programme – the US system that helps pay for care for the poorest.

A health department spokesman said any decision on whether Greendale should team up with Mount Health “is a matter for the local health economy.”

A spokesman for Greendale North CCG said if the deal went ahead, and if it was then exported to Europe any profits would go back into the NHS locally. “This can be good for patients locally and good for the finances of the local health economy as well as in the long run.”

However, Tom Parsons, a lecturer in health at Greendale University as well as a local councillor, said a study by the Nuffield Trust of an experiment in virtual wards in Croydon, South London, showed “it was not very successful. It didn’t really stop patients coming into hospital. So these people are setting out to make money out something that doesn’t work anyway.”

A spokesman for the Nuffield Trust said its study did show that overall patients did feel they got better care from the virtual ward, but there was little evidence that it reduced demands on the hospital or saved money.”

---------------------------------------------------------------------------------------------------------------------

***Top NHS boss worried about local NHS***

John Lennin, chief executive of the NHS National Commissioning Board, said he is worried about the finances of Greendale’s local NHS.

“They are not really dealing with the money,” he told the Greendale Courier in an exclusive interview.

They are doing lots of interesting things with their plans for virtual wards and reshaping services, but I am very concerned that they may not have a proper financial grip.

“I am going round the country talking to CCG chiefs and I will certainly be talking to those in Greendale and expressing my concerns. I am not convinced that all these ideas will prove value for money.

Issue 2 May 2013

---------------------------------------------------------------------------------------------------------------------

**GREENDALE COURIER**

------------------------------------------------------------------------------------------------------------------------

***Mother dies as maternity unit is “full to overflowing”***

*By our Sickie Correspondent*

A mother has died and her baby is in intensive care after being turned away from the maternity unit at Chrysalis Hospital.

May Streeter, 39 of Harrington Street , Greendale, was taken by ambulance to Chrysalsis hospital bleeding profusely after she went into sudden labour at home but once she got there at 2 in the morning she was told the unit was full to overflowing, Dan, 41 her grieving husband said.

“We were held outside for what seemed like forever, Mr Streeter said, before being told that the unit was overflowing and we had to go Appleton. May was in agony, and there was blood everywhere and she went unconscious before we got there.

“She was rushed into Appleton but I was told two hours later that she had died. The baby survived but she’s in intensive care and I just don’t know what I am going to do.”

The Care Quality Commission – in the NHS inspectorate – has been called in to investigate the case as a spokesman for Chrysalsis said it wished to apologise profusely to the family.

“The unit was under unprecedented pressure,” a spokesman said “and a clinical judgement was made that it would be far safer to transfer Mrs Streeter to Appleton. Clearly that was a misjudgement and we are investigating precisely what happened. Until that investigation is complete we cannot comment further.”

The shocking death follows a critical report on Greendale’s maternity services from the CQC last year and comes amid rumours that the Greendale Partnership is proposing closure of at least one and possibly two of the local maternity units, with two of the other three being downgraded to units staffed by midwives only with no on-the-spot cover from doctors.

Board papers shows that the Greendale Partnership has agreed in principle to a “reconfiguration” of the five maternity units across the borough.

June Tree, shop steward for the Royal College of Nursing, said “we still don’t have all the details. But the rumour is that two of the five units could be closed and two of the others will lose their consultant cover.

“That will mean more travelling time for mums-to-be which is very worrying in the light of this dreadful case. We are also very worried about what it could mean more generally for the hospitals whose maternity units are downgraded. This can be the thin end of the wedge. Once acute maternity goes, other services can follow.

Issue 3 July 2013

---------------------------------------------------------------------------------------------------------------------

**GREENDALE COURIER**

------------------------------------------------------------------------------------------------------------------------

***Wholesale hospital changes and closures being planned by secretive NHS body***

***Local MP demands “who is in charge round here?”***

Plans to close two maternity units, downgrade two more, and shut hospital orthopaedics departments in favour of a trauma centre and a new hips and knees factory are being drawn up by Greendale Partnership, the somewhat secretive body that represents all of the local NHS interests in Greendale.

The changes are likely to see Chrysalis hospital lose both its maternity unit and orthopaedics department. A top consultant at the hospital warned that was “a big play towards the hospital’s closure.” He told the Courier unattributably that the “consultant body is very unhappy” about the plans adding that “I am sure the non-medical staff and the patients will be too.”

At the same time, as the Courier has already reported, a US health giant is planning to work with some of the local hospitals to run “virtual” rather than real wards, while the borough’s community and mental health services are considering merger.

Tom Parsons, a local Labour councillor and health lecturer at Greendale University, said: “This new secretive partnership, which doesn’t meet in public and which has no democratic legitimacy, appears hell bent on turning the whole of our local health system upside down. We don’t want to see profits put before patients and patients do not want to lose their local maternity and orthopaedic services”.

As the proposals become clearer, however, there appear to be real tensions between the proposals being drawn up by the partnership and the local clinical commissioning groups, the new GP –led bodies who are now responsible for “buying” care for local patients.

Asked if she believed mums-to-be want to have to travel further to deliver their babies, Dr Ruth O’Hare, chair of Greendale North CCG, said: “No, of course they don’t. But we have to consider safety and other issues, and we will look at this and make a decision after talking to our members GPs, other clinicians and our patient representatives.”

Dr O’Hare said the proposal to shut maternity units and downgrade others had been drawn by the hospitals which had put the idea to the partnership. When the Courier pointed out that the CCG is itself part of the partnership that is making all these radical proposals, Dr O’Hare said the ideas came from the hospitals, but it was the CCGs, as the purchasers of care, who would finally decide.

Harry Burnstone, the local Labour MP, said: “There seem to be massive changes being proposed for our local health service, but I can’t find anyone who is actually in charge of making them, and that fills me with alarm.

“I will be writing to the health secretary demanding to know who is charge of decision making around here.”

Cindy Walker, chair of the Greendale Save Our NHS Campaign, said: “There seems to be a wholesale agenda to privatise and dismantle our local health service by this government and by the local health service itself.

“We are launching a petition against all these hospital closures and are planning a march for next month.” Asked who the march would be on, she said, “we are not sure yet. But if it is our local GPs who are going to be making these decisions on the clinical commissioning group then I guess we will be marching on them while making our views crystal clear to the health secretary.”

.

**PRESS RELEASE FROM HARRY BURNSTONE MP**

**April 1 2013**

Health ministers are worried about Greendale NHS’s plans to team up with a US health giant to treat patients in non-existent “virtual wards”, according to Harry Burnstone, Greendale’s Labour MP.

“I have written to the health minister and raised this is an adjournment debate,” Mr Burnstone said, in a press release. “He told me afterwards that he too was very worried about the idea of a US health company which has been fined for cheating on the US health system getting involved in the NHS.

“He gave me a personal assurance that this would not go ahead without safeguards.”

Mr Burnstone said he had been “highly alarmed” by the Greendale Courier’s revelation of the potential US tie-up. Mr Burnstone said he would also be raising with Professor Ara Darzi, the chair of the recently formed Greendale Partnership concerns expressed by John Lenin, the NHS chief executive, about the state of the local NHS finances.

The Partnership, a new grouping of all local NHS interests, had some interesting ideas for changing services, Mr Lenin had told the Greendale Courier, but he was worried there was “a lack of grip” on the finances.

***HEALTH SERVICE JOURNAL***

**April 12 2013**

**NHS set to miss savings target**

John Lenin, the chief executive of the NHS Commissioning Board, has announced further pressure on hospitals to meet the ‘Lenin productivity challenge’ under which the NHS has to save £20bn over the next few years.

Publishing this year’s “tariff” – the price hospitals are paid for treatments – Mr Lenin announced a 5 per cent real terms across the board cut. In cash terms, that means hospitals will be paid 8 per cent less per procedure.

“We simply are not yet making enough progress in driving efficiency in the NHS,” Mr Lenin said, “so there is a clear need to act to ensure that the service makes the savings needed.”

# Supplementary Materials 5

**The Lateral Play simulation: ICHP Programmes developed following the simulation**

**
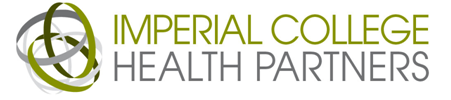
**

| **ICHP strategic objectives** | **Projects** | **Project Objectives** |
| --- | --- | --- |
| **Enable the discovery of best practice** | Alignment and dissemination of research | - Identification of new knowledge from research for implementation. - Improved patient access to research with a single repository of all patients consented to participate in research. - Reinvigorate Primary Care research & education network - Single point of entry to reduce lead time with greater standardisation of research management and governance protocols within the NWL sector |
| Intelligent use of data | - Collaborative use of informatics data with NWL Commissioning Support Unit - Creation of linked data across health and possibly social care - Potential for NWL to be national demonstrator site - Develop a suite of applications for linked data informed by NHS and industry need - Identification of an appropriate robust data warehouse as a tool to measure ICHP Projects |
| Mental Health | - Strategic scoping of current position of mental health and mental healthcare services in NWL - Agree set of priorities with Mental Health Programme Board for ICHP Clinical Advisory Group programme of work - Develop and host seminar for leading academics and clinicians in mental health in NWL. |
| **Adopt best practice systematically** | Patient Safety | - Research to establish cross-system clinicians perspective on key patient safety factors across NWL in primary care, mental health and cancer - Promote a culture of continual learning for leaders across the sector on placing the quality of patient care, especially patient safety, above all other aims for investment, inquiry, improvement, regular reporting, encouragement and support - Align the induction and mandatory training for junior doctors moving across organisations within the system by introducing core and common approach across all organisations (Collaboration with LETB). - Identify the current variation in approach across NWL to patient safety Board reporting and establish a performance measurement process to monitor success of project and associated work streams. |
| Evaluation of Whole Systems Integration (WSI) | - Lead the development and execution of the WSI evaluation to ensure the investment provides value for money and leads to measurable outcomes. - Provide information on best practice from around the world by bringing together thought leaders to enable partners to co-design the model effectively. |
| Chronic Obstructive Pulmonary Disease (COPD) | - Strategic review of current level of diffusion and to secondary care bundle implementation and engage with CLAHRC to develop a Primary Care bundle - Identify best practice for COPD and collaborate with appropriate stakeholders to diffuse across the sector to achieve best practice outcome. |
| Cardiovascular rehabilitation | - Establish best practice for cardiovascular rehabilitation and the management of patients at high risk of cardiovascular disease. |
| Cancer | - Specific objectives to be developed and agreed on early diagnosis and intervention, compliance with best practice pathways, monitoring of outcome measures (in association with LCA and Cancer Registry) - Promote Cancer SBRI amongst stakeholders |
|  | Neurorehabilitation | - Conduct a network-wide service review including detailed clinically-informed capacity and demand analysis across all providers and levels of care up to Level 1 specialist rehabilitation. - Development of a web-based interactive system that would act as a common waiting list for patients. This will allow active case management and efficient matching of need to provision as well as improved surveillance of blockages and inefficiencies in the system. - Design and pilot an innovative cross-organisational model of integrated rehabilitation. |
| **Support wealth creation in the sector and beyond** | Overseas development | - Develop a sector offer to assist international development - Develop operating model with partners - Introduce formal philanthropic offer to partners alongside commercial outfit |
| Collaboration with industry | - Develop a “matchmaker” infrastructure for its partners to systematically articulate need among partner organisations and enable industry to respond to this need in a standardised and transparent form - Develop a proactive engagement with industry |


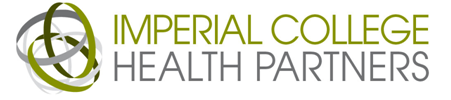

Supplement: MOESM1 [file 15897102]
